# Supplementary material for: The variation and evolution of complete human centromeres
Source: PubMed Central journal article supplement (PMC10312506; doi:10.1101/2023.05.30.542849), 2023-05-30
Supplement: media-2.pdf [file media-2.pdf]

## **SUPPLEMENTARY INFORMATION FOR:**

### **The variation and evolution of complete human centromeres**

**This PDF file includes:**

- 1. Supplementary Notes 1 and 2**
- 2. References**

## SUPPLEMENTARY NOTES

**Supplementary Note 1. Analysis of the CHM1 karyotype.** We first assessed the karyotype of the CHM1 genome using three orthogonal methods: Giemsa staining, spectral karyotyping, and single-cell sequencing of template DNA strands (Strand-seq; **Extended Data Figs. 2,3**). All three methods indicate that the CHM1 cell population is biclonal, with approximately 71% of cells existing in a diploid or near-diploid state and approximately 29% of cells existing in a tetraploid or near-tetraploid state (**Extended Data Figs. 2a,b**). Both diploid/near-diploid and tetraploid/near-tetraploid cells have multiple chromosomal rearrangements, including a translocation between chromosomes 4q35.1 and 11q24.3 (**Extended Data Figs. 2c,d**), a translocation between chromosomes 16q23.3 to 17q25.3 (**Extended Data Figs. 2e,f**), and a loss of chromosome 17 or the chromosome 17 p-arm in a subset of cells (**Extended Data Fig. 2f**). The translocation between chromosomes 4q35.1/11q24.3 is accompanied by a complete deletion of *STOX2* and *ADAMTS15* and partial deletion of the *ADAMTS8* (**Extended Data Fig. 3c**). *ADAMTS15* is predicted to act as a tumor suppressor gene in breast and colorectal cancer<sup>1,2</sup>. Additionally, the translocation between chromosomes 16q23.3 to 17q25.3 results in a novel gene fusion between *CDH13* and *RPTOR* (**Extended Data Fig. 3d**), which are both associated with cancer<sup>3-6</sup> and may contribute to the observed karyotype of the CHM1 cell line.

**Supplementary Note 2. Loss of two distinct chromosomal regions in the CHM1 cell line.** Mapping of native PacBio HiFi and ONT long-read sequencing data to the CHM1 centromere assemblies reveals a reduction in coverage on the p-arm-proximal side of the chromosome 17 centromere (**Extended Data Fig. 4**), consistent with the loss of the p-arm in a subset of cells (**Extended Data Fig. 2f**). It also reveals a reduction in coverage over a 631-kbp region in the *D13Z2*  $\alpha$ -satellite higher-order repeat (HOR) array on chromosome 13 (**Extended Data Fig. 4**), indicating this region is deleted in a subset of cells.

## SUPPLEMENTARY INFORMATION REFERENCES

1. Porter, S. *et al.* ADAMTS8 and ADAMTS15 expression predicts survival in human breast carcinoma. *International Journal of Cancer* **118**, 1241–1247 (2006).
2. Vilorio, C. G. *et al.* Genetic Inactivation of ADAMTS15 Metalloprotease in Human Colorectal Cancer. *Cancer Research* **69**, 4926–4934 (2009).
3. Toyooka, K. O. *et al.* Loss of expression and aberrant methylation of the CDH13 (H-cadherin) gene in breast and lung carcinomas. *Cancer Res* **61**, 4556–4560 (2001).
4. Sato, M., Mori, Y., Sakurada, A., Fujimura, S. & Horii, A. The H-cadherin (CDH13) gene is inactivated in human lung cancer. *Hum Genet* **103**, 96–101 (1998).
5. Zhu, Q. *et al.* Hypomethylation of RPTOR in peripheral blood is associated with very early-stage lung cancer. *Clin Chim Acta* **537**, 173–180 (2022).
6. Lu, X. *et al.* Meta-analysis of the association between mTORC1-related genes polymorphisms and cancer risk. *Pathol Res Pract* **229**, 153696 (2022).
